Title : HEMOSTASIS MODIFICATIONS OBSERVED IN THORACO-ABDOMINAL ANEURYSM SURGERY

Authors : Ch. M. Samama, M.D., A. Ankri, M.D., G. Godet, M.D., L.S. Montejó, M.D., S. Mouren, M.D., W. Benhalima, M.D., T. Cherrak, M.D., E. Kieffer, M.D., P. Viars, M.D.

Affiliation : Département d'Anesthésie-Réanimation. Groupe Hospitalier Pitié-Salpêtrière.  
Université Paris VI, 83, boulevard de l'Hôpital. 75651 Paris Cédex 13 - FRANCE

**INTRODUCTION.** Although massive coagulopathy and bleeding are to be feared during thoraco-abdominal aneurysm (TAA) repair, only few studies have investigated the blood coagulation disorders in this setting. Disseminated intravascular coagulation (DIC), graft replacement, hepatic dysfunction induced by supraceliac clamping and hemodilution have been suggested as the possible causes of the coagulation defects (1). Fresh Frozen Plasma and Platelet infusion have been proposed to prevent bleeding disorders but the usefulness of such a treatment has not been established.

The aim of this preliminary study was to determine the variations in hemostasis during TAA surgery. Fresh Frozen Plasma and/or Platelet were avoided unless uncontrollable bleeding occurred.

**METHODS. Patients.** 8 consecutive patients (mean age 56) scheduled for TAA surgery were included in this study after approval by our Ethics Committee. None of them had hepatic disease. Preoperative treatment included : calcium blockers (n=2), beta blockers (n=2).

**Anesthetic and surgical management.** After premedication, radial artery and Swan-Ganz catheters were inserted. Anesthesia was induced with a benzodiazepine, fentanyl, pancuronium and maintained under mechanical ventilation with N<sub>2</sub>O 50 % in O<sub>2</sub> and isoflurane. Blood pressure was controlled during surgery and thoracic aortic cross-clamping by increasing the inspired concentration of isoflurane. Ringer Lactate (RL), Human Serum Albumin (4 %) (HSA 4 %), blood bank packed red cells, autologous red cells (Cell Saver<sup>®</sup>) were infused according to the patient hemodynamics of hematocrit (Hct). The surgical procedure consisted of Dacron<sup>®</sup> graft replacement of the diseased aorta without a cardiopulmonary by-pass or shunting technique and without heparin administration. Mean duration of the cross-clamping was  $41 \pm 4$  minutes.

**Hemostasis study.** Blood samples were drawn at the following times : T0 : before anesthesia ; T1 : 30 min after aortic unclamping ; T2 : first postoperative day ; T3 : fifth postoperative day. They included : serum protein level, Hct, Platelet count (Plt), Partial Thromboplastin Time (PTT) and Prothrombin Time (PT) (Chronometric Methods Organon), Fibrinogen (Fg) (Clauss Method Stago), Antithrombin III Ag, C and S Protein (CP and SP) (Laurell Electro Immuno Assay, Stago), Plasminogen (Radial-immuno diffusion Stago), Ethanol test (Godal Method), Fibrin Split Products (FSP), D-Dimers (D-Di test Stago), Tissue Plasminogen Activator (tPA-Ag) (ELISA Stago) Plasminogen Activator Inhibitor (PAI) (Amidolytic Assay Stago). All data were expressed as mean  $\pm$  SEM and analyzed using two way ANOVA.

**RESULTS.** Central temperature was  $33.6 \pm 0.3^\circ\text{C}$  at T1 and  $36.7 \pm 0.6^\circ\text{C}$  at T2. From the beginning of surgery until 30 min after unclamping, fluid infusion consisted of RL  $4062 \pm 602$  ml, HSA 4 %  $1337 \pm 351$  ml, bank

red cells  $1.63 \pm 1.2$  U, autol. red cells  $3.9 \pm 1.4$  U. During this period, blood loss was  $2193 \pm 652$  ml and urinary output was  $752 \pm 163$  ml. Hemostasis parameters are reported in table 1.

Table 1 :

|                                            | CONTROL        | POST-<br>UNCLAMPING | 1th POSTOP<br>DAY | 5th POST<br>DAY |
|--------------------------------------------|----------------|---------------------|-------------------|-----------------|
| Serum proteins (g.l <sup>-1</sup> )        | $51 \pm 1$     | $36 \pm 2^*$        | $40 \pm 2^*$      | $47 \pm 3$      |
| Hct (Vol %)                                | $38 \pm 1$     | $30 \pm 3^*$        | $28 \pm 1^*$      | $31 \pm 2^*$    |
| Plt (10 <sup>9</sup> .l <sup>-1</sup> )    | $232 \pm 23$   | $143 \pm 31^*$      | $109 \pm 25^*$    | $192 \pm 36$    |
| PTT (s)                                    | $34 \pm 2$     | $92 \pm 12^*$       | $47 \pm 4$        | $44 \pm 6$      |
| PT (% vs control)                          | $89 \pm 2$     | $45 \pm 7^*$        | $59 \pm 5^*$      | $80 \pm 10$     |
| Fg (mg.10 <sup>-1</sup> .l <sup>-1</sup> ) | $393 \pm 30$   | $187 \pm 34^*$      | $278 \pm 46^*$    | $713 \pm 76^*$  |
| C Protein (%)                              | $118 \pm 19$   | $50 \pm 9^*$        | $47 \pm 7^*$      | $82 \pm 16^*$   |
| S Protein (%)                              | $105 \pm 8$    | $57 \pm 7^*$        | $56 \pm 7^*$      | $89 \pm 113^*$  |
| AT III (%)                                 | $88 \pm 6$     | $47 \pm 7^*$        | $45 \pm 7^*$      | $82 \pm 7$      |
| Plasminogen (%)                            | $97 \pm 7$     | $46 \pm 6^*$        | $50 \pm 5^*$      | $100 \pm 12$    |
| FSP (mcg.ml <sup>-1</sup> )                | $< 10$         | $21 \pm 9$          | $12 \pm 2$        | $10 \pm 2$      |
| D-Dimers (mcg.ml <sup>-1</sup> )           | $0.75 \pm 0.2$ | $1.1 \pm 0.2$       | $2.7 \pm 1.4^*$   | $1 \pm 0.3$     |
| tPA (ng.ml <sup>-1</sup> )                 | $6 \pm 1$      | $11 \pm 1$          | $10 \pm 2$        | $9 \pm 2$       |
| PAI (IU.ml <sup>-1</sup> )                 | $7 \pm 1$      | $4 \pm 1$           | $37 \pm 9^*$      | $5 \pm 2$       |

\*  $p < 0.05$  vs control

The coagulation disorders are maximal after the aorta is unclamped. The ethanol test was negative throughout the study. Significant increase in D-Dimers and PAI was noted the first postoperative day.

One patient suffering from breast cancer died at the end of the surgical procedure with uncontrollable bleeding at the graft site, despite FFP and Platelet administration. No preoperative (T0) or peroperative (T1) results was predictable of this issue.

**DISCUSSION.** All patients presented intra and post-operatively a severe hemodilution as evidenced by a marked drop in Hct, serum proteins, Plt, PT, PTT, Fg, etc ... The significant increase in D-Dimers seen in first postoperative day reflects a slight DIC which was clinically insignificant. Excluding an intraoperative death, none of our patients developed any clinically significant hemostatic complication. This interesting finding highlights the possibility that, although a definite coagulation disorder, as evidenced by our results, exists in this setting, it may not necessarily be as clinically important as one thought. The question of the usefulness of FFP and Platelets in this setting is also raised.

#### REFERENCES

1. COHEN JR et al : Ann Vasc Surg 1 : 552-557, 1987
